# Supplementary material for: The scalability in the mechanochemical syntheses of edge functionalized graphene materials and biomass-derived chemicals
Source: Royal Society of Chemistry journal article supplement (doi:10.1039/c4fd00007b), 2014-01-01
Supplement: c4fd00007b7.pdf [file c4fd00007b7.pdf]

# Electronic Supplementary Information for Scalability in the Mechanochemical Syntheses of Graphene Materials and Biomass-derived Chemicals

5 Richard G. Blair<sup>a\*</sup>, Katerina Chagoya<sup>b</sup>, Scott Biltek<sup>c</sup>, Steven Jackson<sup>c</sup>, Ashlyn Sinclair<sup>c</sup>, Alexandra Taraboletti<sup>a</sup>, and David T. Restrepo<sup>d</sup>

DOI: 10.1039/b000000x [DO NOT ALTER/DELETE THIS TEXT]

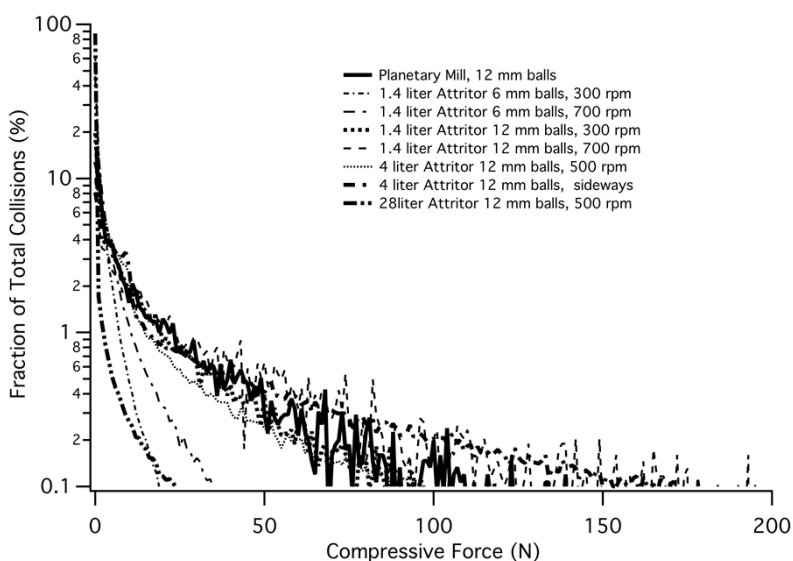

**Figure S1.** Distribution of compressive forces for various mill implemented in the hydrolysis of cellulose and the oxidation of graphite.

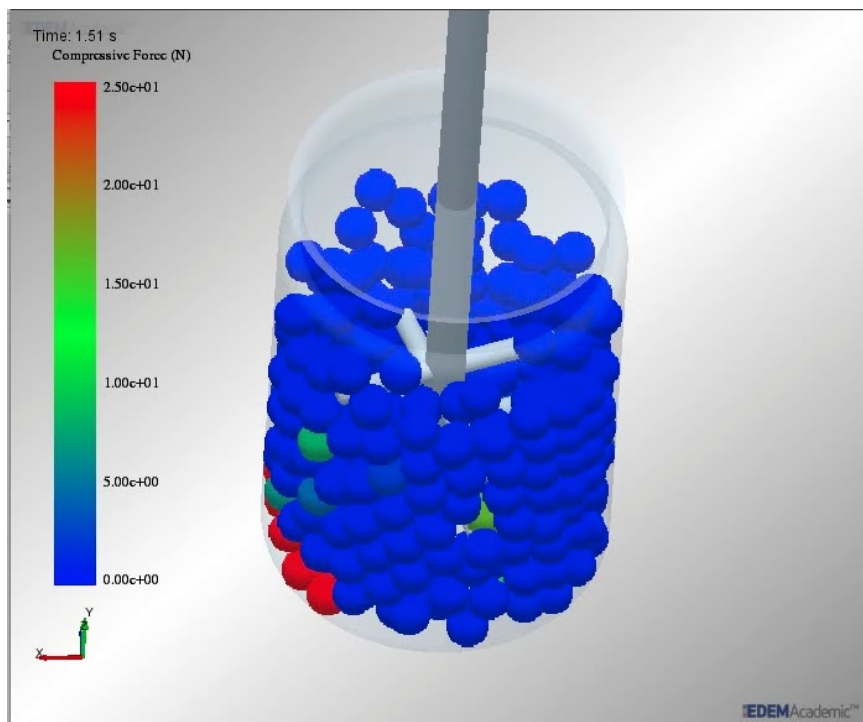

**Figure S2.** A 1.4 liter tank with 12 mm media at 300 RPM, file designation: 1p4\_attritor\_0p5\_300.avi

5

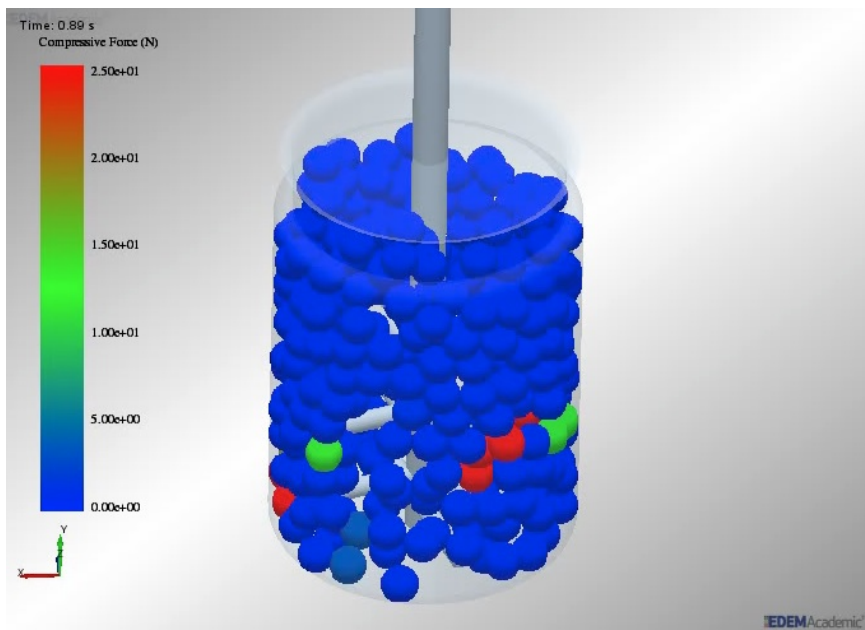

**Figure S3.** A 1.4 liter tank with 12 mm media at 700 RPM, file designation: lp4\_attritor\_0p5\_700.avi

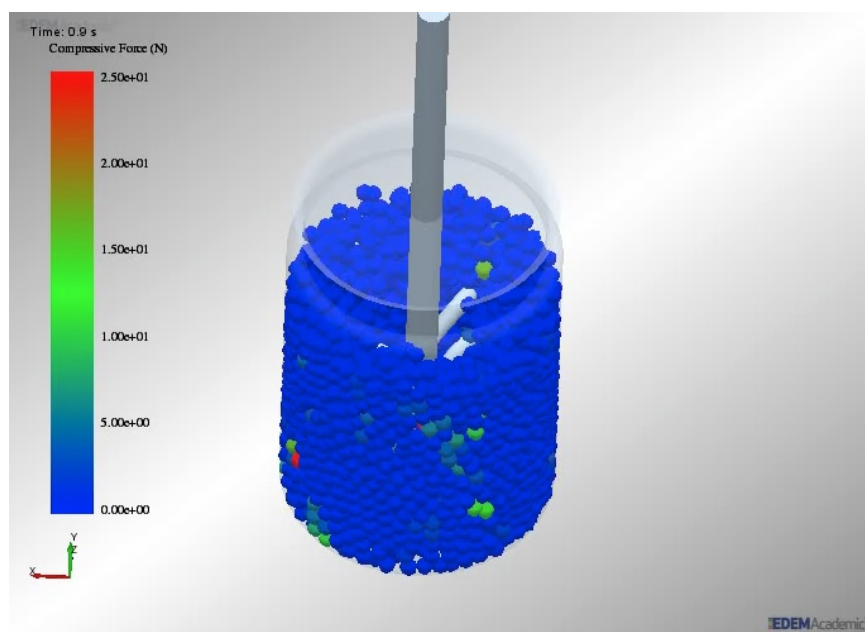

**Figure S4.** A 1.4 liter tank with 6 mm media at 700 RPM, movie file designation: lp4\_attritor\_0p25\_700.avi

5

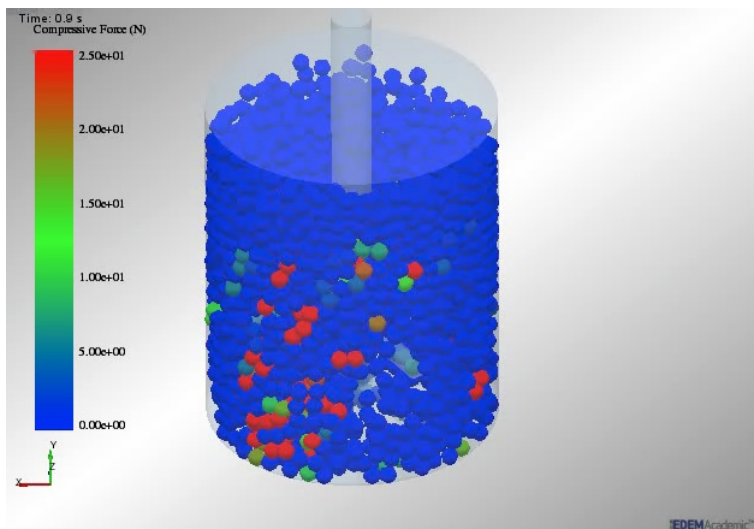

**Figure S5.** A 4 liter tank with 12 mm media at 500 RPM, movie file designation: 4l\_attritor\_0p5\_500.avi

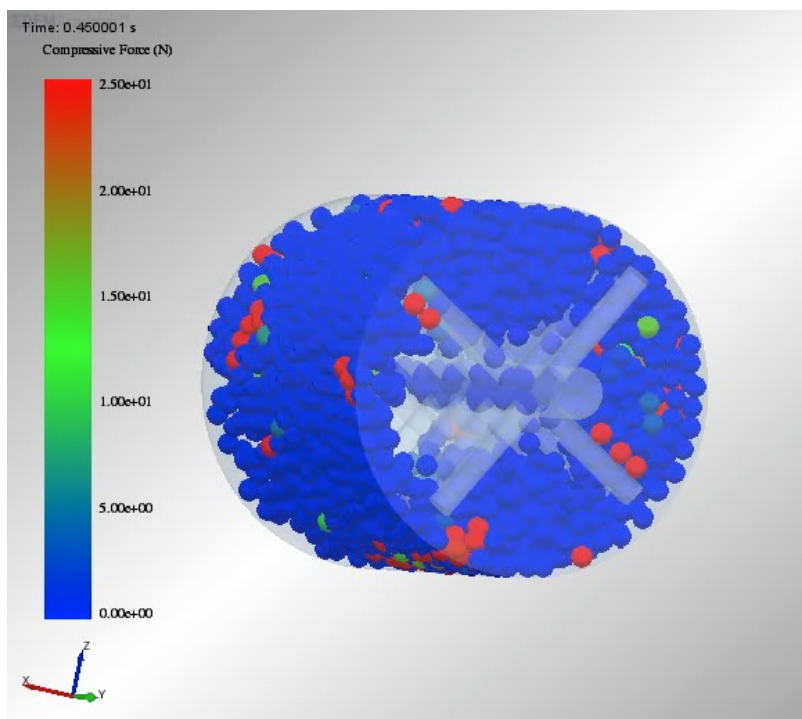

**Figure S6.** A 4 liter tank with 12 mm media at 500 RPM sideways, movie file designation: 4l\_attritor\_0p5\_500\_side.avi

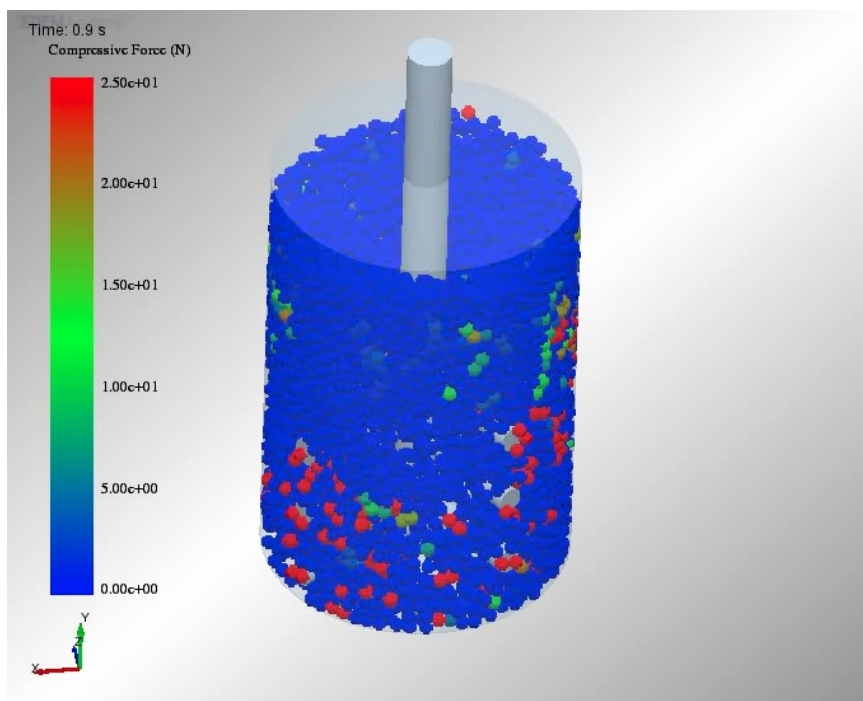

**Figure S7.** A 28 liter tank with 12 mm media at 500 RPM, movie file designation: 28l\_attritor\_0p5\_500.avi
